# Supplementary material for: Inward H+ pump xenorhodopsin: Mechanism and alternative optogenetic approach
Source: PubMed Central journal article supplement — Sci Adv. 2017 Sep 22;3(9):e1603187. doi: 10.1126/sciadv.1603187 (PMC5609834; doi:10.1126/sciadv.1603187), 2017-09-22
Supplement: 1603187_SM.pdf [file 1603187_SM.pdf]

## Supplementary Materials for

### **Inward H<sup>+</sup> pump xenorhodopsin: Mechanism and alternative optogenetic approach**

Vitaly Shevchenko, Thomas Mager, Kirill Kovalev, Vitaly Polovinkin, Alexey Alekseev, Josephine Juettner, Igor Chizhov, Christian Bamann, Charlotte Vavourakis, Rohit Ghai, Ivan Gushchin, Valentin Borshchevskiy, Andrey Rogachev, Igor Melnikov, Alexander Popov, Taras Balandin, Francisco Rodriguez-Valera, Dietmar J. Manstein, Georg Bueldt, Ernst Bamberg, Valentin Gordeliy

Published 22 September 2017, *Sci. Adv.* **3**, e1603187 (2017)

DOI: 10.1126/sciadv.1603187

#### **This PDF file includes:**

- fig. S1. Phylogenetic tree of microbial rhodopsin proteins.
- fig. S2. Sequence alignment of microbial rhodopsins.
- fig. S3. Photocycles of the *NsXeR* in nanodisc (ND, upper row) and liposome (LIP, lower row) preparations (20°C, pH 7.5).
- fig. S4. Crystal packing of *NsXeR*.
- fig. S5. Overall architecture of *NsXeR*.
- fig. S6. Comparison of *NsXeR* structure with structures of other microbial rhodopsins.
- fig. S7. Details of the *NsXeR* proton-translocation pathway.
- fig. S8. Action spectrum of photocurrents in NG108-15 cells expressing *NsXeR* (black) and *NsXeR* absorption spectrum (red).
- fig. S9. *NsXeR* photocurrents in response to ultrashort light pulses.
- fig. S10. Light intensity dependence of *NsXeR*.
- fig. S11. Variability of spike latency.
- table S1. Crystallographic data collection and refinement statistics.
- table S2. List of mutations to *NsXeR* and their implications on proton pumping.

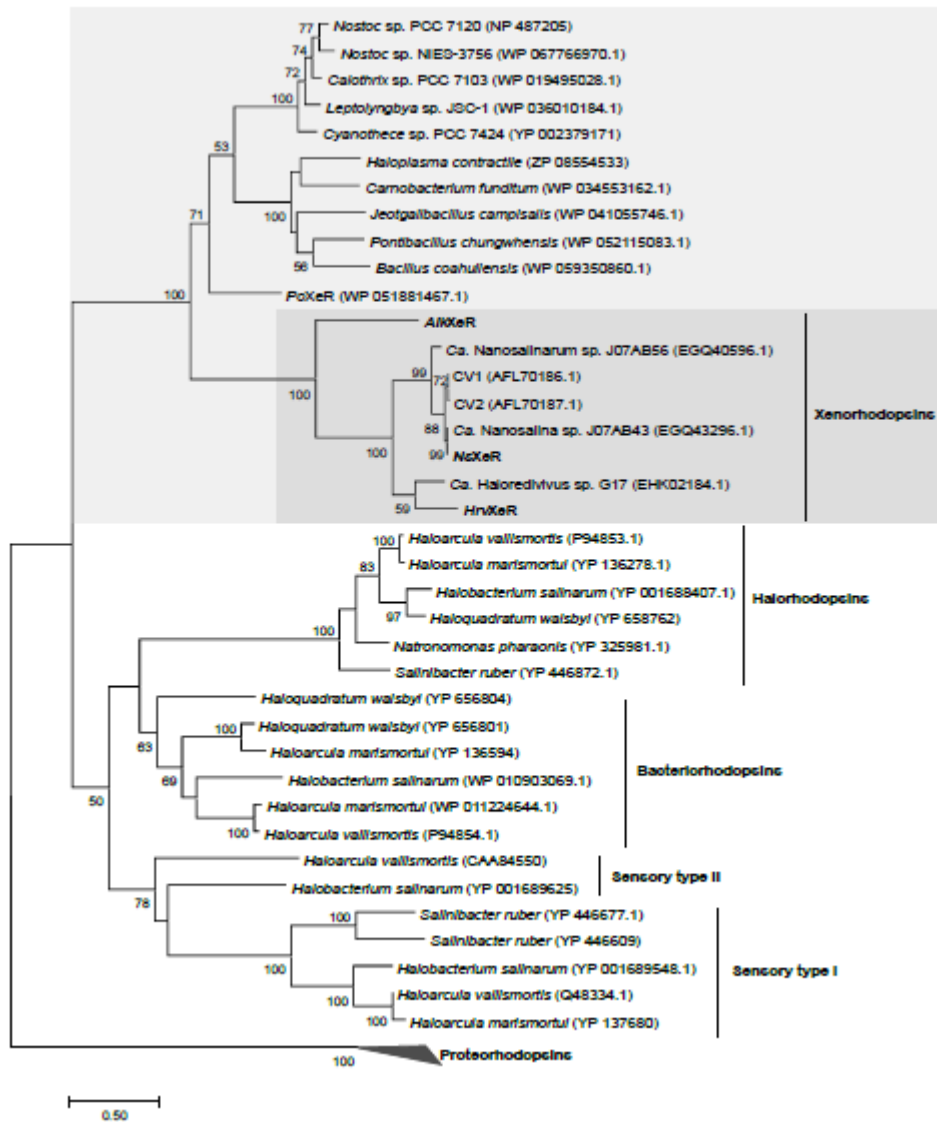

**fig. S1. Phylogenetic tree of microbial rhodopsin proteins.** 38 rhodopsin sequences were aligned using MUSCLE. Phylogenetic reconstruction was conducted by maximum-likelihood (ML) using MEGA6 with the following parameters: Jones-Taylor-Thornton model, 100 bootstraps, gamma distribution with five discrete categories, positions with less than 80% site coverage were eliminated. Only bootstraps greater than 50% are shown. Genbank accession numbers are written in parentheses for each protein. The genes, which encode the proteins studied in our work are in bold.

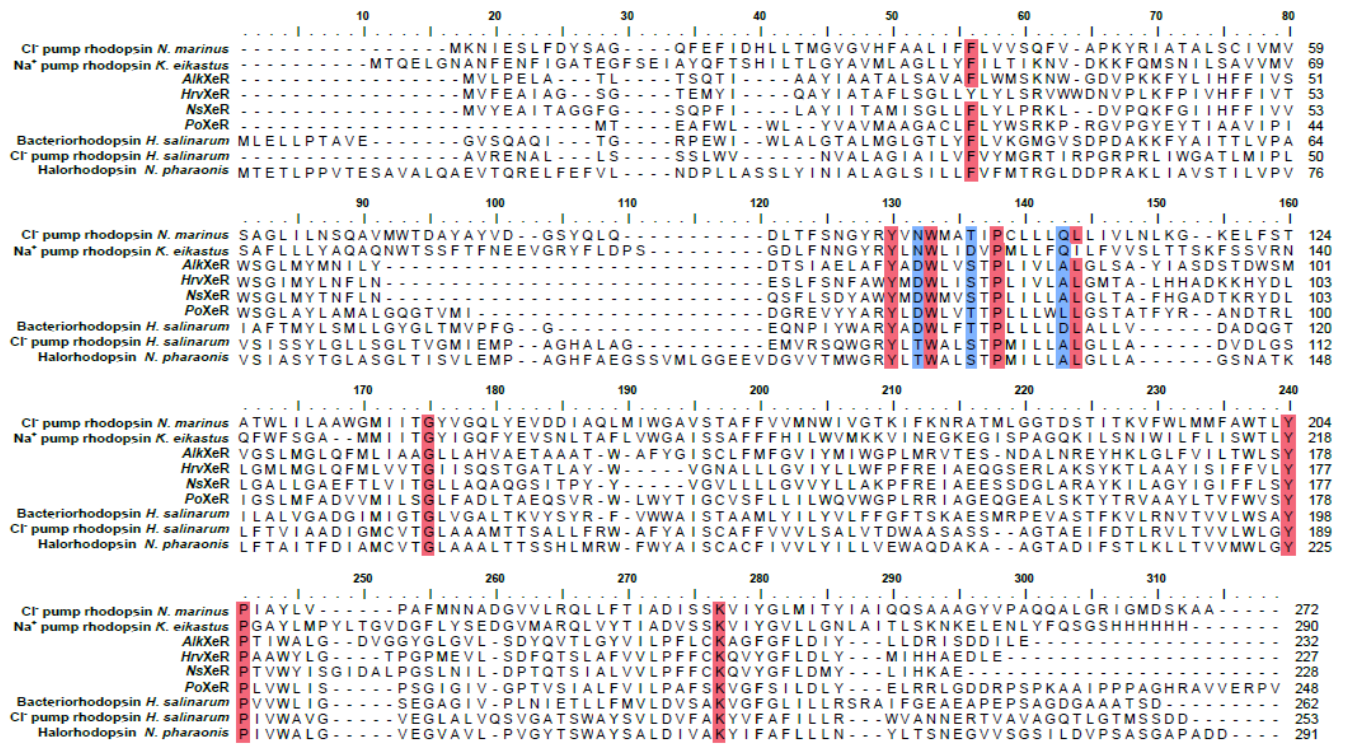

**fig. S2. Sequence alignment of microbial rhodopsins.** The sequence alignment was performed with Clustal Omega. The motif amino acids are colored blue. Highly conserved regions are colored red.

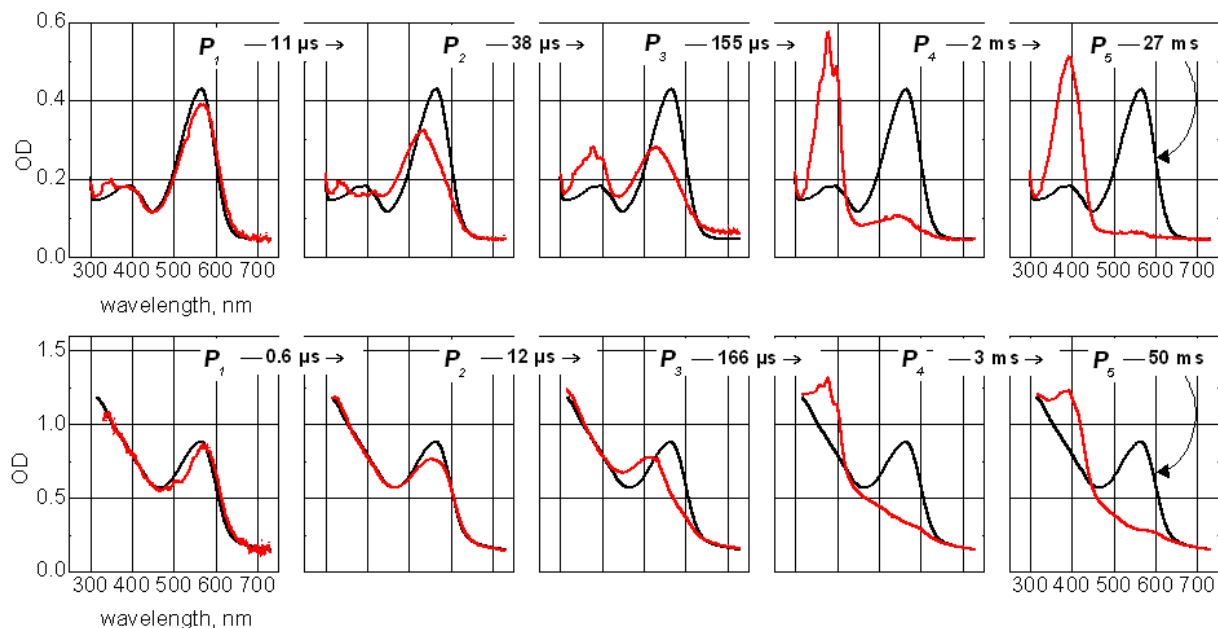

**fig. S3. Photocycles of the *NsXeR* in nanodisc (ND, upper row) and liposome (LIP, lower row) preparations (20°C, pH 7.5).** Five kinetically distinct protein states (red lines) are obtained via global multi exponential analysis of the flash photolysis data exemplified in the Fig. 2b. An each panel contains for the reference the correspondent spectrum on unexcited protein ( $P_0$ , black lines). The spectra of  $P_{i=1..5}$  states were calculated from correspondent spectra of exponents, which were further converted to the differential spectra of the states assuming the sequential irreversible model of the photocycle. The half-times of reactions are depicted between the panels. The fraction of cycled molecules was 12.5 % in ND, and 15 % in LIP.

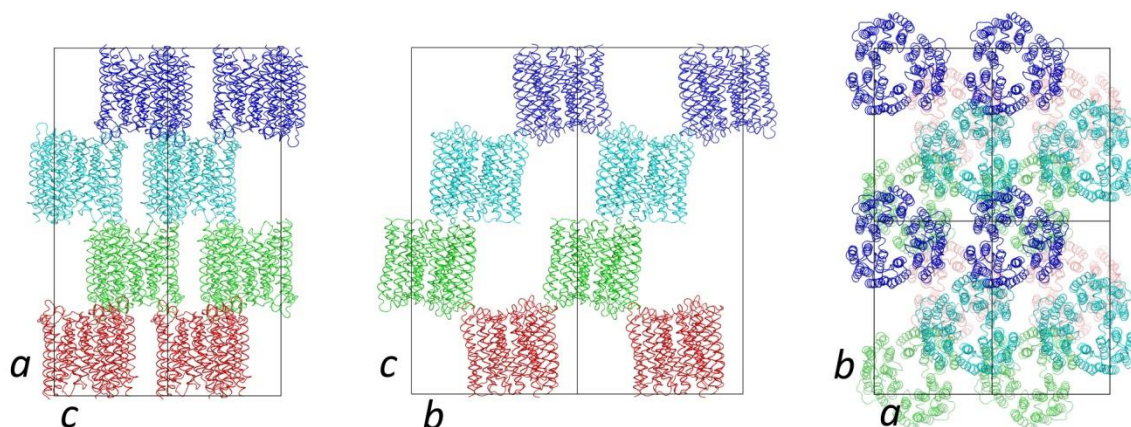

**fig. S4. Crystal packing of *NsXeR*.**

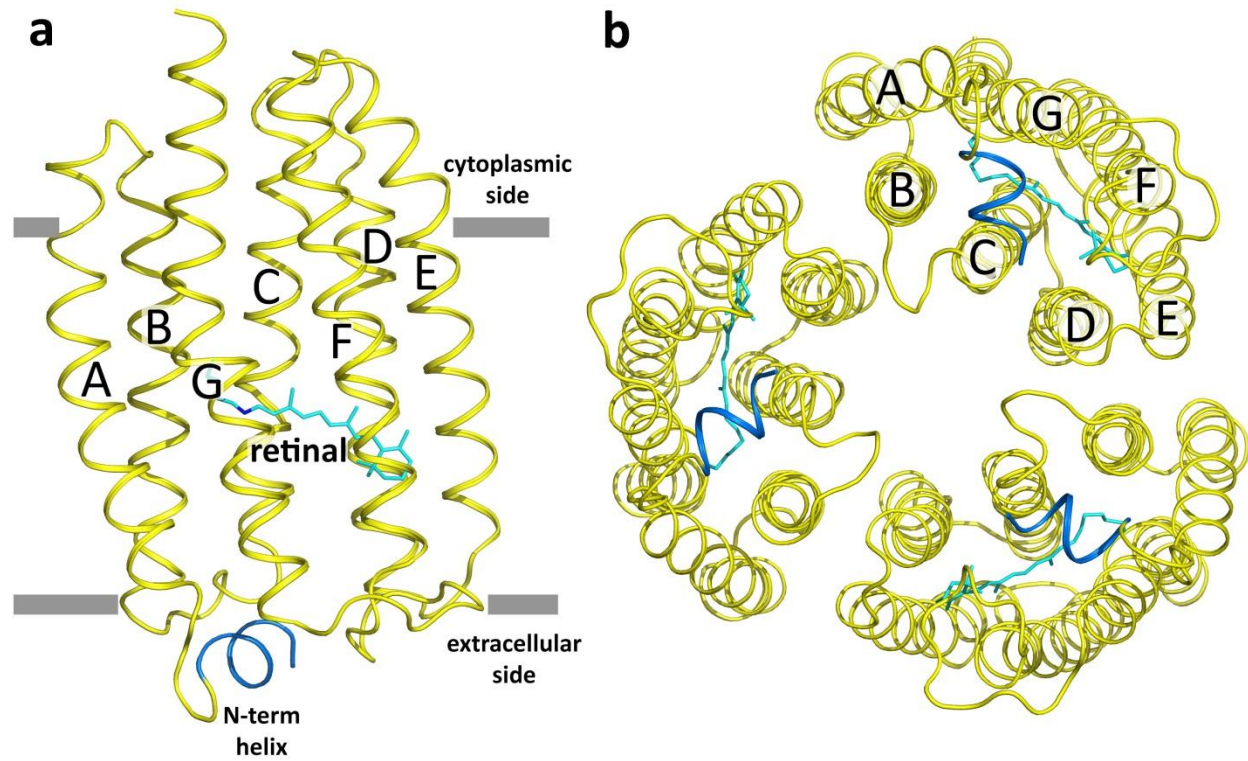

**fig. S5. Overall architecture of NsXeR.** **a.** NsXeR fold. **b.** NsXeR trimer. The N-terminal  $\alpha$ -helix is colored blue. Helices A-G are subscribed, retinal is colored cyan. The hydrophobic membrane core boundaries were calculated using the PPM server and are shown by the gray lines.



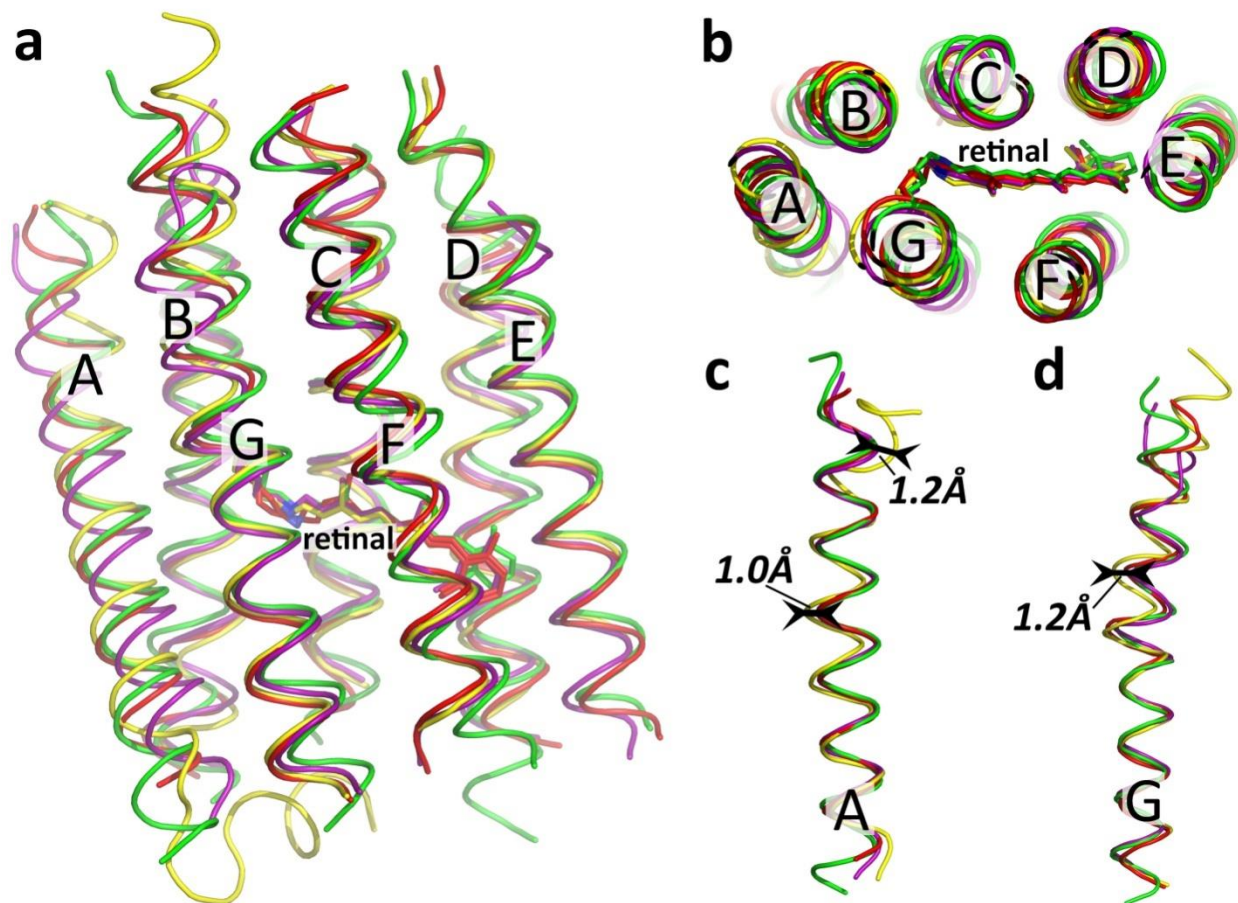

**fig. S6. Comparison of *NsXeR* structure with structures of other microbial rhodopsins.**

**a.** Comparison of the *NsXeR* backbone structure with those of bacteriorhodopsin (BR, purple, PDB 1C3W), anabaena sensory rhodopsin (ASR, red, PDB 1XIO) and proteorhodopsin (ESR, green, PDB 4HYJ). The loops and termini (except N-terminal helix of *NsXeR*) are not shown. **b.** Comparison of the retinal positions from the cytoplasmic side of the protein. **c.** Comparison of helix A separately. The deviations of *NsXeR* helix A are shown with arrows. **d.** Comparison of helix G separately. The deviations of *NsXeR* helix G are shown with arrows.

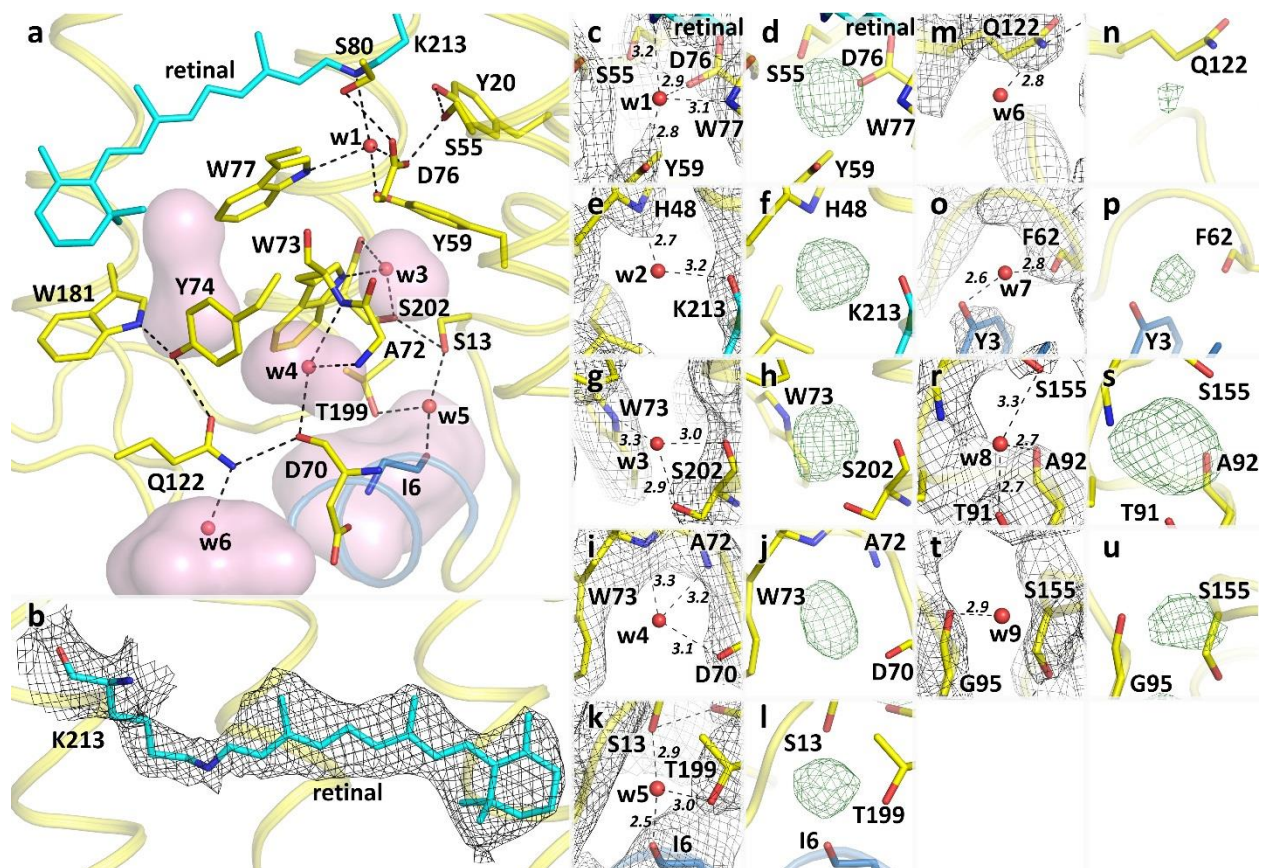

**fig. S7. Details of the *NsXeR* proton-translocation pathway.** **a.** Key amino acids and protein active center. N-term helix is colored blue. **b.** Example of *NsXeR* 2Fo-Fc electron density maps in the retinal region. The retinal is present in all-*trans* conformation and colored cyan. The maps are contoured at the level of  $1.5\sigma$ . **c-u.** Example of *NsXeR* 2Fo-Fc and Fo-Fc electron density maps near water molecules 1-9. The maps are contoured at the level of  $1.5\sigma$ . Fo-Fc electron density maps are built with *NsXeR* model missing water molecules. The Fo-Fc maps are contoured at the level of  $3\sigma$  and colored green.

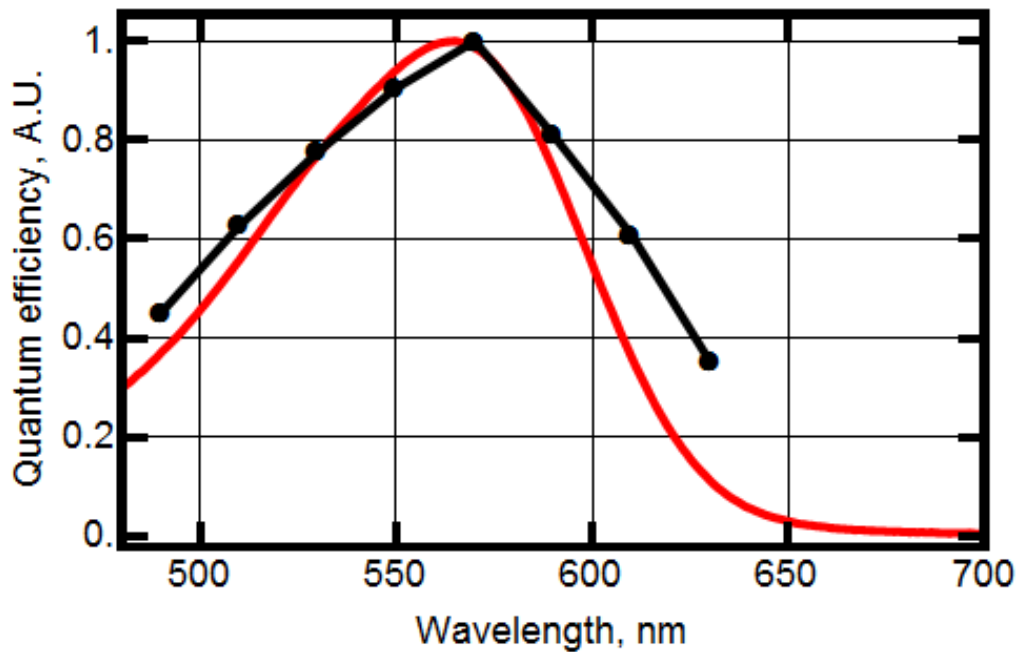

fig. S8. Action spectrum of photocurrents in NG108-15 cells expressing *NsXeR* (black) and *NsXeR* absorption spectrum (red).

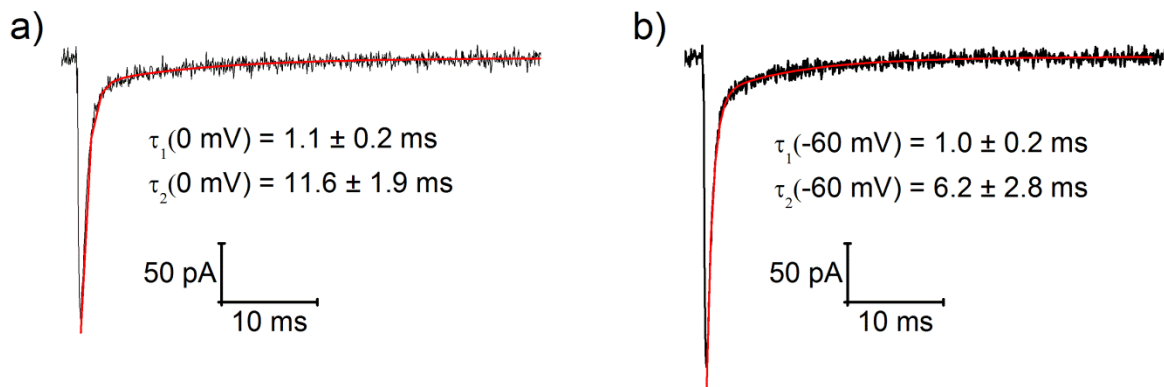

fig. S9. *NsXeR* photocurrents in response to ultrashort light pulses. Nanosecond light pulses ( $\lambda = 560 \text{ nm}$ ) were generated by the Opolette 355 tunable laser system (OPTOPRIM). Shown are typical photocurrents which were measured in NG108-15 cells heterologously expressing *NsXeR* at a membrane potential of a) 0 mV and b) -60 mV. The red line is a fit of the current decay using a biexponential function. Given are average  $\tau_{\text{off}}$  values ( $n = 5$ ) and the corresponding standard deviations.



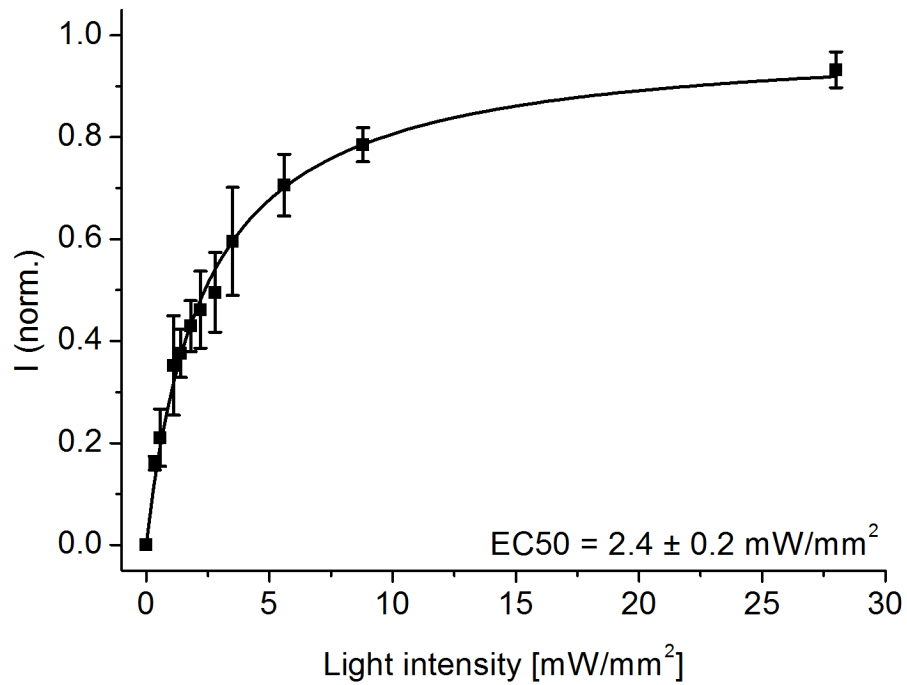

**fig. S10. Light intensity dependence of *NsXeR*.** NG108-15 cells, heterologously expressing *NsXeR*, C-terminally fused to the Kir2.1 membrane trafficking signal, were investigated by whole cell patch clamp experiments at a membrane potential of -100 mV. The photocurrents were measured in response to 500 ms light-pulses of indicated light intensities ( $\lambda=532$  nm). The graphs show average values from normed stationary photocurrents ( $n=3$ ) and the corresponding standard deviations. The solid line is a fit to the data using a hyperbolic model function with a half saturating value  $EC_{50}$  and a fixed  $v_{\max}=1$ .

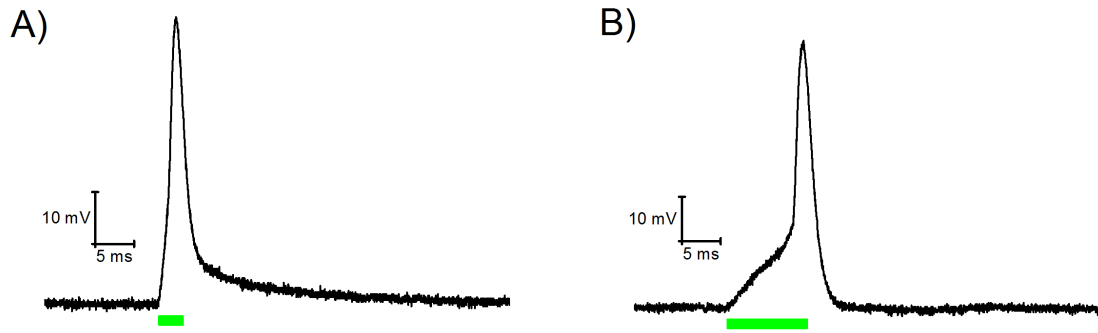

**fig. S11. Variability of spike latency.** Exemplary spiking traces measured in different neuronal cells. The light pulses had pulse widths of A) 3 ms and B) 10 ms. Rat hippocampal neurons heterologously expressing *NsXeR*, C-terminally fused to the Kir2.1 membrane trafficking signal, were investigated by patch-clamp experiments in the whole cell configuration under current clamp conditions. The spikes were triggered by light pulses with a wavelength of  $\lambda = 532$  nm and a saturating light intensity of  $23$  mW/mm<sup>2</sup>. The current densities of the corresponding photocurrents, determined by measurements in the voltage clamp mode, were A)  $15.3$  pA/pF and B)  $4.1$  pA/pF.

**table S1. Crystallographic data collection and refinement statistics.**

|                                          |                                               |
|------------------------------------------|-----------------------------------------------|
| <b>Data collection</b>                   |                                               |
| Space group                              | P2 <sub>1</sub> 2 <sub>1</sub> 2 <sub>1</sub> |
| Cell dimensions                          |                                               |
| <i>a</i> , <i>b</i> , <i>c</i> (Å)       | 64.01, 93.87, 196.21                          |
| $\alpha$ , $\beta$ , $\gamma$ (°)        | 90, 90, 90                                    |
| Resolution (Å)                           | 50-2.5 (2.56-2.50)                            |
| R <sub>merge</sub> (%)                   | 28.6 (185.9)                                  |
| <i>I</i> / $\sigma$ <i>I</i>             | 9.56 (0.98)                                   |
| Completeness (%)                         | 100.0 (99.9)                                  |
| CC (%)                                   | 99.9 (32.9)                                   |
| <b>Refinement</b>                        |                                               |
| Resolution (Å)                           | 12-2.5                                        |
| No. reflections                          | 39282                                         |
| R <sub>work</sub> /R <sub>free</sub> (%) | 20.97/25.40                                   |
| No. atoms                                |                                               |
| Protein                                  | 5388                                          |
| Water                                    | 54                                            |
| Lipid fragments                          | 545                                           |
| Retinal                                  | 60                                            |
| <i>B</i> factors (Å <sup>2</sup> )       |                                               |
| Protein                                  | 38.2                                          |
| Water                                    | 97.6                                          |
| Lipid fragments                          | 104.1                                         |
| Retinal                                  | 34.6                                          |
| r.m.s. deviations                        |                                               |
| Bond lengths (Å)                         | 0.0011                                        |
| Bond angles (°)                          | 0.4271                                        |

**table S2. List of mutations to *NsXeR* and their implications on proton pumping.**

| <b>Proton translocation validation</b>   |                          |                                      |
|------------------------------------------|--------------------------|--------------------------------------|
| H48X                                     |                          | Not folded, cells not colored        |
| D76E, D76N, D76S, D76T                   |                          | Not folded, cells not colored        |
| D220N                                    | No pumping               | Colored cells                        |
| D220E                                    | Fully functional         |                                      |
| C212A, C212D                             |                          | Not folded, cells not colored        |
| C212S                                    | Lowered pumping          |                                      |
| H94(ELRVG)                               | Lowered pumping          |                                      |
| <b>Conservative aminoacids mutations</b> |                          |                                      |
| W73R                                     |                          | Not folded, cells not colored        |
| W73A                                     | Strongly lowered pumping | Colored cells                        |
| W73Y                                     | Lowered pumping          |                                      |
| S55A                                     |                          | Not folded, cells not colored        |
| P209G                                    | Strongly lowered pumping |                                      |
| P209D                                    |                          | Not folded, cells not colored        |
| <b>N-terminus</b>                        |                          |                                      |
| $\Delta$ 2-12                            | Lowered pumping          | Colored, not stable when solubilized |
| E4Q                                      | Fully functional         |                                      |
| E4A, E4L                                 | Lowered pumping          |                                      |
